# Supplementary material
Source: PubMed Central journal article supplement (PMC5247610)
Supplement: MCB.00279-16_zmb999101391s1.pdf [file MCB.00279-16_zmb999101391s1.pdf]

1 **Supplementary Materials and Methods**

2 **TABLE S1. Plasmids used in this work**

| Plasmid       | Description                                                                                 | Reference      |
|---------------|---------------------------------------------------------------------------------------------|----------------|
| pUG72         | <i>Amp<sup>R</sup>, pUCori, loxP::URA3::loxP</i>                                            | 25             |
| pSH63         | <i>Amp<sup>R</sup>, pUCori, GAL1Prom, cre, TRP1, CEN/ARS</i>                                | 25             |
| pME2791       | pRS416GAL1 with <i>GAL1Prom</i> <i>CYC1Term</i> , <i>URA3</i> , <i>CEN/ARS</i>              | 75             |
| pME2787       | pRS426MET25 with <i>MET25Prom</i> . <i>CYC1Term</i> , <i>URA3</i> , 2μm                     | 75             |
| pME2624       | <i>MET25Prom</i> , <i>CYC1Term</i> , <i>URA3</i> , 2 μm, <i>ASC1</i>                        | our collection |
| pME2532       | <i>MET25Prom</i> , <i>CYC1Term</i> , <i>URA3</i> , 2 μm, <i>Strep</i> for C-terminal fusion | our collection |
| pME2536       | <i>MET25Prom</i> , <i>CYC1Term</i> , <i>URA3</i> , 2 μm, <i>Strep</i> for N-terminal fusion | our collection |
| pME2834       | <i>MET25Prom</i> , <i>CYC1Term</i> , <i>URA3</i> , 2 μm, <i>ASC1-Strep</i>                  | our collection |
| pME2835       | <i>MET25Prom</i> , <i>CYC1Term</i> , <i>URA3</i> , 2 μm, <i>Strep-ASC1</i>                  | our collection |
| pASK-IBA7plus | <i>Amp<sup>R</sup>, fl origin, Strep-tag, Xa cleavage site</i>                              | IBA GmbH       |
| pME4132       | <i>Amp<sup>R</sup>, fl origin, Strep-Xa-ASC1</i>                                            | This work      |
| pME4135       | <i>MET25Prom</i> , <i>CYC1Term</i> , <i>bla</i> , <i>URA3</i> , 2 μm, <i>Strep-Xa-ASC1</i>  | This work      |
| pME4364       | pME2791 with <i>ASC1</i> and its native promoter (+500bp)                                   | This work      |
| pME4384       | pME2791 with <i>asc1R38DK40E</i> ( <i>asc1DE</i> ) and its native promoter                  |                |
| pME4124       | pME2834 with <i>asc1DE</i>                                                                  | This work      |
| pME4386       | pME4364 with <i>asc1DE-D109Y</i>                                                            | This work      |
| pME4365       | pME4364 with <i>asc1<sup>T12A</sup></i>                                                     | This work      |
| pME4366       | pME4364 with <i>asc1<sup>T12A</sup>DE</i>                                                   | This work      |
| pME4367       | pME4364 with <i>asc1<sup>T12E</sup></i>                                                     | This work      |
| pME4368       | pME4364 with <i>asc1<sup>T12E</sup>DE</i>                                                   | This work      |
| pME4025       | pME2834 with <i>asc1<sup>T96A</sup></i>                                                     | This work      |
| pME4370       | pME2834 with <i>asc1<sup>T96A</sup>DE</i>                                                   | This work      |
| pME4026       | pME2834 with <i>asc1<sup>T96E</sup></i>                                                     | This work      |
| pME4371       | pME2834 with <i>asc1<sup>T96E</sup>DE</i>                                                   | This work      |
| pME4027       | pME2834 with <i>asc1<sup>T99A</sup></i>                                                     | This work      |
| pME4372       | pME2834 with <i>asc1<sup>T99A</sup>DE</i>                                                   | This work      |

|         |                                                    |           |
|---------|----------------------------------------------------|-----------|
| pME4028 | pME2834 with <i>ascI</i> <sup>T99E</sup>           | This work |
| pME4373 | pME2834 with <i>ascI</i> <sup>T99E</sup>           | This work |
| pME4029 | pME2834 with <i>ascI</i> <sup>T96A T99A</sup>      | This work |
| pME4125 | pME2834 with <i>ascI</i> <sup>T96A T99A</sup> DE   | This work |
| pME4030 | pME2834 with <i>ascI</i> <sup>T96E T99E</sup>      | This work |
| pME4374 | pME2834 with <i>ascI</i> <sup>T96E T99E</sup> DE   | This work |
| pME4385 | pME4364 with <i>ascI</i> D109Y                     | This work |
| pME4120 | pME2834 with <i>ascI</i> <sup>S120A</sup>          | This work |
| pME4375 | pME4364 with <i>ascI</i> <sup>S120A</sup> DE       | This work |
| pME4121 | pME2834 with <i>ascI</i> <sup>S120E</sup>          | This work |
| pME4122 | pME2834 with <i>ascI</i> <sup>T143A</sup>          | This work |
| pME4395 | pME4364 with <i>ascI</i> <sup>T143A</sup>          | This work |
| pME4376 | pME2834 with <i>ascI</i> <sup>T143A</sup> DE       | This work |
| pME4396 | pME4364 with <i>ascI</i> <sup>T143A</sup> DE       | This work |
| pME4473 | pME4364 with <i>ascI</i> <sup>T143A</sup> D109Y    | This work |
| pME4123 | pME2834 with <i>ascI</i> <sup>T143E</sup>          | This work |
| pME4387 | pME4364 with <i>ascI</i> <sup>T143E</sup>          | This work |
| pME4377 | pME2834 with <i>ascI</i> <sup>T143E</sup> DE       | This work |
| pME4388 | pME4364 with <i>ascI</i> <sup>T143E</sup> DE       | This work |
| pME4474 | pME4364 with <i>ascI</i> <sup>T143E</sup> D109Y    | This work |
| pME4031 | pME2834 with <i>ascI</i> <sup>S166A</sup>          | This work |
| pME4126 | pME2834 with <i>ascI</i> <sup>S166A</sup> DE       | This work |
| pME4032 | pME2834 with <i>ascI</i> <sup>S166E</sup>          | This work |
| pME4033 | pME2834 with <i>ascI</i> <sup>T168A</sup>          | This work |
| pME4127 | pME2834 with <i>ascI</i> <sup>T168A</sup> DE       | This work |
| pME4034 | pME2834 with <i>ascI</i> <sup>T168E</sup>          | This work |
| pME4035 | pME2834 with <i>ascI</i> <sup>S166A T168A</sup>    | This work |
| pME4128 | pME2834 with <i>ascI</i> <sup>S166A T168A</sup> DE | This work |
| pME4036 | pME2834 with <i>ascI</i> <sup>S166E T168E</sup>    | This work |
| pME4378 | pME2834 with <i>ascI</i> <sup>Y250F</sup>          | This work |
| pME4379 | pME2834 with <i>ascI</i> <sup>Y250F</sup> DE       | This work |
| pHK697  | <i>RPS2-GFP, URA3, CEN/ARS</i>                     | 76        |

4 **TABLE S2. *S. cerevisiae* strains used in this work**

5 For Asc1p phospho-site mutations that caused Asc1p-dependent phenotypes at least two  
6 independent clones with individual strain designations were generated and tested. The only  
7 exception is the *asc1*<sup>T12A</sup>DE strain.

| Strains                | Genotype                                                                     | Reference            |
|------------------------|------------------------------------------------------------------------------|----------------------|
| RH2817                 | <i>MATα, ura3-52, trp1::hisG</i>                                             | 19                   |
| RH3263                 | <i>MATα, ura3-52, trp1::hisG, leu2::hisG, Δasc1::LEU2</i>                    | 19                   |
| RH3510                 | <i>MATα, ura3-52, trp1::hisG, asc1-loxP SNR24</i>                            | 15                   |
| Y02724                 | BY4741, Mat a, <i>his3ΔI, Δleu2, Δmet15, Δura3, YLR113w(HOG1)::kanMX4</i>    | Euroscarf collection |
| RH3500                 | <i>MATα, ura3-52, trp1::hisG, Δasc1::URA3</i>                                | This work            |
| RH3549, RH3550         | <i>MATα, ura3-52, trp1::hisG, asc1DE</i>                                     | This work            |
| RH3431                 | <i>MATα, ura3-52, trp1::hisG, FLO8-myc<sup>3</sup>-TRP1</i>                  | 15                   |
| RH3504                 | <i>MATα, ura3-52, trp1::hisG, asc1-loxP SNR24, FLO8-myc<sup>3</sup>-TRP1</i> | 15                   |
| RH3599                 | <i>MATα, ura3-52, trp1::hisG, asc1DE, FLO8-myc<sup>3</sup>-TRP1</i>          | This work            |
| RH3623, RH3624, RH3625 | <i>MATα, ura3-52, trp1::hisG, asc1<sup>T12A</sup></i>                        | This work            |
| RH3626                 | <i>MATα, ura3-52, trp1::hisG, asc1<sup>T12A</sup>DE</i>                      | This work            |
| RH3627, RH3628, RH3629 | <i>MATα, ura3-52, trp1::hisG, asc1<sup>T12E</sup></i>                        | This work            |
| RH3630, RH3631         | <i>MATα, ura3-52, trp1::hisG, asc1<sup>T12E</sup>DE</i>                      | This work            |
| RH3529                 | <i>MATα, ura3-52, trp1::hisG, asc1<sup>T96A</sup></i>                        | This work            |
| RH3539, RH3540, RH3541 | <i>MATα, ura3-52, trp1::hisG, asc1<sup>T96A</sup>DE</i>                      | This work            |
| RH3530                 | <i>MATα, ura3-52, trp1::hisG, asc1<sup>T96E</sup></i>                        | This work            |
| RH3542, RH3543         | <i>MATα, ura3-52, trp1::hisG, asc1<sup>T96E</sup>DE</i>                      | This work            |
| RH3531                 | <i>MATα, ura3-52, trp1::hisG, asc1<sup>T99A</sup></i>                        | This work            |
| RH3611, RH3612, RH3613 | <i>MATα, ura3-52, trp1::hisG, asc1<sup>T99A</sup>DE</i>                      | This work            |
| RH3532                 | <i>MATα, ura3-52, trp1::hisG, asc1<sup>T99E</sup></i>                        | This work            |
| RH3614, RH3615, RH3616 | <i>MATα, ura3-52, trp1::hisG, asc1<sup>T99E</sup>DE</i>                      | This work            |
| RH3533, RH3534, RH3535 | <i>MATα, ura3-52, trp1::hisG, asc1<sup>T96A T99A</sup></i>                   | This work            |

|                        |                                                                             |           |
|------------------------|-----------------------------------------------------------------------------|-----------|
| RH3544, RH3545, RH3546 | <i>MATα, ura3-52, trp1::hisG, ascI<sup>T96A T99A</sup>DE</i>                | This work |
| RH3537, RH3538         | <i>MATα, ura3-52, trp1::hisG, ascI<sup>T96E T99E</sup></i>                  | This work |
| RH3547, RH3548         | <i>MATα, ura3-52, trp1::hisG, ascI<sup>T96E T99E</sup>DE</i>                | This work |
| RH3551                 | <i>MATα, ura3-52, trp1::hisG, ascI<sup>S120A</sup></i>                      | This work |
| RH3575, RH3576, RH3577 | <i>MATα, ura3-52, trp1::hisG, ascI<sup>S120A</sup>DE</i>                    | This work |
| RH3574                 | <i>MATα, ura3-52, trp1::hisG, ascI<sup>S120E</sup></i>                      | This work |
| RH3578, RH3579, RH3580 | <i>MATα, ura3-52, trp1::hisG, ascI<sup>T143A</sup></i>                      | This work |
| RH3584, RH3585, RH3586 | <i>MATα, ura3-52, trp1::hisG, ascI<sup>T143A</sup>DE</i>                    | This work |
| RH3581, RH3582, RH3583 | <i>MATα, ura3-52, trp1::hisG, ascI<sup>T143E</sup></i>                      | This work |
| RH3587, RH3588, RH3589 | <i>MATα, ura3-52, trp1::hisG, ascI<sup>T143E</sup>DE</i>                    | This work |
| RH3590                 | <i>MATα, ura3-52, trp1::hisG, ascI<sup>S166A</sup></i>                      | This work |
| RH3638                 | <i>MATα, ura3-52, trp1::hisG, ascI<sup>S166A</sup>DE</i>                    | This work |
| RH3591, RH3592         | <i>MATα, ura3-52, trp1::hisG, ascI<sup>S166E</sup></i>                      | This work |
| RH3593, RH3594, RH3595 | <i>MATα, ura3-52, trp1::hisG, ascI<sup>T168A</sup></i>                      | This work |
| RH3639, RH3640         | <i>MATα, ura3-52, trp1::hisG, ascI<sup>T168A</sup>DE</i>                    | This work |
| RH3596, RH3597         | <i>MATα, ura3-52, trp1::hisG, ascI<sup>T168E</sup></i>                      | This work |
| RH3598                 | <i>MATα, ura3-52, trp1::hisG, ascI<sup>S166A T168A</sup></i>                | This work |
| RH3536                 | <i>MATα, ura3-52, trp1::hisG, ascI<sup>S166A T168A</sup>DE</i>              | This work |
| RH3637                 | <i>MATα, ura3-52, trp1::hisG, ascI<sup>S166E T168E</sup></i>                | This work |
| RH3635, RH3641, RH3642 | <i>MATα, ura3-52, trp1::hisG, ascI<sup>Y250F</sup></i>                      | This work |
| RH3636, RH3643, RH3644 | <i>MATα, ura3-52, trp1::hisG, ascI<sup>Y250F</sup>DE</i>                    | This work |
| RH3487                 | <i>MATα, ura3-52, trp1::hisG, Δarg4::URA3</i>                               | This work |
| RH3489                 | <i>MATα, ura3-52, trp1::hisG, Δarg4::loxP</i>                               | This work |
| RH3491                 | <i>MATα, ura3-52, trp1::hisG, Δarg4::loxP, Δlys1::URA3</i>                  | This work |
| RH3493                 | <i>MATα, ura3-52, trp1::hisG, Δarg4::loxP, Δlys1::loxP</i>                  | This work |
| RH3519                 | <i>MATα, ura3-52, trp1::hisG, ascI-URA3 SNR24, Δarg4::loxP, Δlys1::loxP</i> | This work |
| RH3520                 | <i>MATα, ura3-52, trp1::hisG, ascI-loxP SNR24 Δarg4::loxP, Δlys1::loxP,</i> | This work |
| RH3570                 | <i>MATα, ura3-52, trp1::hisG, ascIDE, Δarg4::URA3</i>                       | This work |

|        |                                                                                                                                                 |           |
|--------|-------------------------------------------------------------------------------------------------------------------------------------------------|-----------|
| RH3571 | <i>MAT<math>\alpha</math></i> , <i>ura3-52</i> , <i>trp1::hisG</i> , <i>asc1DE</i> ,<br>$\Delta$ <i>arg4::loxP</i>                              | This work |
| RH3572 | <i>MAT<math>\alpha</math></i> , <i>ura3-52</i> , <i>trp1::hisG</i> , <i>asc1DE</i> ,<br>$\Delta$ <i>arg4::loxP</i> , $\Delta$ <i>lys1::URA3</i> | This work |
| RH3573 | <i>MAT<math>\alpha</math></i> , <i>ura3-52</i> , <i>trp1::hisG</i> , <i>asc1DE</i> ,<br>$\Delta$ <i>arg4::loxP</i> , $\Delta$ <i>lys1::loxP</i> | This work |

8

9 *Plasmid Construction*

10 Plasmids used in this study are listed within Table S1. Plasmids pME2834 and pME2835 were  
11 generated through amplification of *ASCI* from the yeast genome using oligonucleotides that  
12 introduced *Bam*HI and *Hind*III restriction sites for cloning into plasmids pME2535 and pME2536  
13 respectively. To generate plasmid pME4135, *Strep-ASCI* was amplified from plasmid pME4132  
14 introducing *Nhe*I and *Hind*III restriction sites for cloning into plasmid pME2835. Plasmid  
15 pME4132 was obtained through insertion of the *ASCI* gene into the pASK-IBA7plus plasmid (#2-  
16 1406-000, IBA GmbH) according to the provided instructions. Plasmid pME4364 is derived from  
17 pME2791 and carries *ASCI* under control of its native promoter (+500 bp upstream of *ASCI*  
18 according to (77)). *ASCI* was amplified together with its promoter from genomic *S. cerevisiae* DNA  
19 using oligonucleotides that introduced *Sac*I and *Hind*III restriction sites for subsequent cloning.  
20 Plasmids carrying *asc1* with codon exchanges were constructed via a two-step PCR strategy: In  
21 the first reaction the codon exchange(s) was (or were) introduced within an oligonucleotide bearing  
22 the mutated codon(s) in its center using an *ASCI* wild-type carrying plasmid (pME2834 or  
23 pME4364) as template. In the second PCR the complete *asc1* allele was amplified flanked by the  
24 respective restriction sites for cloning into the parent vector (*Bam*HI and *Hind*III restriction sites  
25 for cloning into pME2834 and *Sac*I and *Hind*III restriction sites for cloning into pME2791). For  
26 construction of plasmids pME4025-pME4036, pME4120-pME4128, pME4370-pME4374, and  
27 pME4376-pME4379 plasmid pME2834 served as the parent vector. Plasmid pME4364 served as

28 parent vector for plasmids pME4365-pME4368, pME4375, and pME4384. For plasmids  
29 comprising an R38D K40E codon exchange in combination with a phosphorylation site mutation  
30 either plasmid pME4124 or pME4384 was used as template for PCR. Alternatively, plasmids that  
31 already comprised a phosphorylation site mutation were used as template for the PCR and the  
32 R38D K40E mutation was introduced by using oligonucleotides bearing the respective codon  
33 exchanges. The plasmids served as templates for amplification of transformation cassettes to  
34 integrate the mutated *ascI* alleles into the yeast genome at its original locus.

35

### 36 *Yeast strains and growth conditions*

37 The *S. cerevisiae* strains used in this study are of the  $\Sigma$ 1278b background and are listed Table S2.  
38 Strains with codon-exchanges within the open-reading frame of *ASC1* (RH3529-RH3551,  
39 RH3574-RH3598, RH3611-RH3616, RH3623-RH3631, RH3635-RH3644) were obtained by  
40 transformation of the  $\Delta asc1::URA3$  strain (RH3500) with the respective *ascI*-alleles carrying  
41 flanking regions identical to those of the *ASC1* gene for homologues recombination. Transformants  
42 were selected for their resistance against 5-fluoroorotic acid (0.5 mg/ml; #R0812, Thermo Fisher  
43 Scientific) due to loss of the *URA3* marker gene. Successful transformations were verified by PCR,  
44 Southern blot (78), and sequencing of the *ASC1* locus. Arginine or arginine and lysine auxotrophic  
45 strains RH3487, RH3489, RH3491, RH3493, and RH3570-RH3573 derived from strains RH2817  
46 and RH3549, respectively, and were generated by replacement of the genes *ARG4* and *LYS1* with  
47 the recyclable *loxP::URA3::loxP* marker cassette that was amplified from plasmid pUG72  
48 according to Gueldener et al. (25). For marker rescue strains were transiently transformed with  
49 plasmid-borne Cre-recombinase (pSH63). An arginine and lysine auxotrophic *asc1SNR24* strain  
50 was generated from the *ASC1* wild-type  $\Delta arg4::loxP \Delta lys1::loxP$  strain RH3493 as described by  
51 Rachfall et al. (15): A *loxP::URA3::loxP* cassette was integrated in exon1 of *ASC1* resulting in

52 strain RH3519. Subsequent rescue of the *URA3* marker led to strain RH3520 with a *loxP* site in the  
53 *ASCI* ORF that abrogates the translation of the mRNA. For metabolic labeling with isotopically-  
54 labeled arginine and lysine  $\Delta arg4::loxP \Delta lys1::loxP$  strains RH3493, RH3520, and RH3573 were  
55 used. Strain RH3599 expressing C-terminally 3xmyc-tagged Flo8p was constructed by  
56 transformation of RH3549 according to Janke et al. (26). Transformations were performed using  
57 the lithium acetate method (79). Strains were cultivated in liquid yeast nitrogen base medium (1.5  
58 g/l YNB without amino acids and ammonium sulfate, 5 g/l ammonium sulfate, 2% glucose)  
59 containing the respective supplements or in yeast-extract peptone dextrose (YEPD) medium (2%  
60 peptone, 1% yeast extract, 2% glucose). 2% agar was added for solid media. Experiment-specific  
61 growth conditions are described in the respective paragraphs.

62

### 63 **Supplementary References**

- 64 75. **Mumberg D, Müller R, Funk M.** 1994. Regulatable promoters of *Saccharomyces*  
65 *cerevisiae*: comparison of transcriptional activity and their use for heterologous expression.  
66 *Nucleic Acids Res* **22**:5767-5768.
- 67 76. **Milkereit P, Strauss D, Bassler J, Gadal O, Kuhn H, Schutz S, Gas N, Lechner J, Hurt**  
68 **E, Tschochner H.** 2003. A Noc complex specifically involved in the formation and nuclear  
69 export of ribosomal 40 S subunits. *J Biol Chem* **278**:4072-4081.
- 70 77. **Kleinschmidt M, Schulz R, Braus GH.** 2006. The yeast *CPC2/ASCI* gene is regulated by  
71 the transcription factors Fhl1p and Ifh1p. *Curr Genet* **49**:218-228.
- 72 78. **Southern EM.** 1975. Detection of specific sequences among DNA fragments separated by  
73 gel electrophoresis. *J Mol Biol* **98**:503-517.
- 74 79. **Ito H, Fukuda Y, Murata K, Kimura A.** 1983. Transformation of intact yeast cells treated  
75 with alkali cations. *J Bacteriol* **153**:163-168.

1 **TABLE S3. LC-MS-based identification of Asc1p-derived phospho-peptides**

- 2 Phospho-sites with the highest post-translational modification (PTM) score are printed in black,  
 3 and all other putative phospho-sites within the peptides in gray.

| Amino acid | Position | Highest PTM score | Peptide sequence                                                                             | Spectral counts | Higest Xcorr (SequestHT) | Highest IonScore (Mascot) |
|------------|----------|-------------------|----------------------------------------------------------------------------------------------|-----------------|--------------------------|---------------------------|
| T          | 12       | 100.00            | G <u>T</u> LEGHNGWVTSLAT <u>S</u> AGQPN<br>LLLSASR                                           | 19              | 5.42                     | 70                        |
| T          | 21       | 45.5              |                                                                                              |                 |                          |                           |
| S          | 22       | 33.3              |                                                                                              |                 |                          |                           |
| T          | 25       | 60.1              |                                                                                              |                 |                          |                           |
| S          | 26       | 39                |                                                                                              |                 |                          |                           |
| S          | 35       | 9.9               |                                                                                              |                 |                          |                           |
| S          | 37       | 79.6              |                                                                                              |                 |                          |                           |
| S          | 120      | 100               | KA <u>S</u> MIIISGSR                                                                         | 2               | -                        | 47                        |
| S          | 124      | 0                 |                                                                                              |                 |                          |                           |
| S          | 126      | 0                 |                                                                                              |                 |                          |                           |
| T          | 143      | 100               | GQCLAT <u>T</u> LLGHNDWVSQVR                                                                 | 29              | 4.54                     | 59                        |
| S          | 152      | 0                 |                                                                                              |                 |                          |                           |
| S          | 166      | 100               | ADDD <u>S</u> <u>V</u> <u>T</u> IIISAGNDK<br>VVPNEKADDD <u>S</u> <u>V</u> <u>T</u> IIISAGNDK | 121<br>25       | 4.87<br>4.37             | 108<br>60                 |
| T          | 168      | 100               |                                                                                              |                 |                          |                           |
| S          | 171      | 90                |                                                                                              |                 |                          |                           |
| Y          | 250      | 100               | <u>Y</u> WLAAATATGIK                                                                         | 21              | 3.51                     | 56                        |
| T          | 256      | 0.3               |                                                                                              |                 |                          |                           |
| T          | 258      | 0                 |                                                                                              |                 |                          |                           |
| S          | 291      | 77.4              | AAEPHAVSLAWSADGQ <u>T</u> LFAG<br>YTDNVIR                                                    | 17              | 5.19                     | 91                        |
| S          | 295      | 93.2              |                                                                                              |                 |                          |                           |
| T          | 300      | 99.9              |                                                                                              |                 |                          |                           |
| Y          | 305      | 0.6               |                                                                                              |                 |                          |                           |
| T          | 306      | 0.2               |                                                                                              |                 |                          |                           |

4



1 **TABLE S4. Overview on proteome data evaluation with *Perseus***

2 Abbreviations: Prot = protein, vs. = versus

| No. | Command                                  | Description                                                                                |                                                                                                                                                                           |
|-----|------------------------------------------|--------------------------------------------------------------------------------------------|---------------------------------------------------------------------------------------------------------------------------------------------------------------------------|
|     |                                          | <i>asc1</i> and <i>asc1DE</i>                                                              | T143 phosphorylation-site mutant strains e.g. <i>asc1</i> <sup>T143A</sup>                                                                                                |
| 1   | Generic matrix upload                    | proteinGroups.txt<br>normalized ratios etc.                                                |                                                                                                                                                                           |
| 2.1 | Filter rows based on categorical columns | Remove rows with + in reverse column                                                       |                                                                                                                                                                           |
| 2.2 |                                          | Remove rows with + in potential contaminant column                                         |                                                                                                                                                                           |
| 2.3 |                                          | Remove rows with + in only identified by site                                              |                                                                                                                                                                           |
| 3   | Transform                                | Inverse ratios (1/x) when <i>ASC1</i> is not in the denominator                            |                                                                                                                                                                           |
| 4   | Transform                                | $\log_2(x)$                                                                                |                                                                                                                                                                           |
| 5   | Normali-<br>zation                       | Subtract column median of ratios                                                           |                                                                                                                                                                           |
| 6   | Categorical annotation rows              | Group biological replicates                                                                |                                                                                                                                                                           |
| 7   | Reorder/<br>remove columns               | Select Prot ratios of interest for the following steps                                     |                                                                                                                                                                           |
| 8.1 | Average groups                           | Calculate median of each group<br>→ <i>protein ratio</i>                                   | Calculate mean of each group                                                                                                                                              |
| 8.2 | Combine expression columns               | -                                                                                          | Calculation of difference between mean of <i>asc1</i> <sup>T143A</sup> / <i>ASC1</i> ratios and <i>ASC1</i> <sup>Aux</sup> / <i>ASC1</i> ratios<br>→ <i>protein ratio</i> |
| 9   | Change column type                       | Change numerical column with <i>protein ratio</i> (steps 8.1 and 8.2) to expression column |                                                                                                                                                                           |
| 10  | Categorical annotation rows              | Define column with <i>protein ratio</i> as own group                                       |                                                                                                                                                                           |
| 11  | One/Two sample(s) tests                  | One sample t-test,<br>p value 0.01                                                         | Two sample t-test,<br>p value 0.01<br>Prot ratios <i>asc1</i> <sup>T143A</sup> / <i>ASC1</i><br>vs.<br>Prot ratios <i>asc1</i> <sup>Aux</sup> / <i>ASC1</i>               |
| 12  | Filter rows based on categorical columns | Keep rows with + (significant) from step 11                                                |                                                                                                                                                                           |
| 13  | Filter rows based on valid values        | Filter <i>protein ratio</i> (steps 8.1 and 8.2) for values outside -0.26 to 0.26           |                                                                                                                                                                           |

3

1 **TABLE S5. Overview on phospho-proteome data evaluation with *Perseus***

2 Abbreviations: PP = phospho-peptide, Prot = protein, norm. = normalized, vs. = versus

| No.  | Command                                  | Description                                                                                                                                                                                       |                                                                                                                                                                                  |
|------|------------------------------------------|---------------------------------------------------------------------------------------------------------------------------------------------------------------------------------------------------|----------------------------------------------------------------------------------------------------------------------------------------------------------------------------------|
|      |                                          | <i>asc1</i>                                                                                                                                                                                       | T143 phosphorylation-site mutant strains e.g. <i>asc1</i> <sup>T143A</sup>                                                                                                       |
| 1    | Generic matrix upload                    | Phospho (STY)sites.txt<br>normalized ratios, localization probability etc.                                                                                                                        |                                                                                                                                                                                  |
| 2.1  | Filter rows based on categorical columns | Remove rows with + in reverse column                                                                                                                                                              |                                                                                                                                                                                  |
| 2.2  |                                          | Remove rows with + in potential contaminant column                                                                                                                                                |                                                                                                                                                                                  |
| 3    | Expand site table                        | In order to have only one column per sample                                                                                                                                                       |                                                                                                                                                                                  |
| 4    | Transform                                | Inverse ratios (1/x) when <i>ASC1</i> is not already in the denominator                                                                                                                           |                                                                                                                                                                                  |
| 5    | Transform                                | $\log_2(x)$                                                                                                                                                                                       |                                                                                                                                                                                  |
| 6    | Reorder/<br>remove columns               | Select PP ratios of interest for the following steps                                                                                                                                              |                                                                                                                                                                                  |
| 7    | Matching rows by name                    | Matching PP ratios with respective Prot ratios from step 7 of Table S2 (in the case that a phospho-peptide cannot be assigned to a single protein the median of the protein ratios is calculated) |                                                                                                                                                                                  |
| 8    | Categorical annotation rows              | Group PP ratios and Prot ratios for biological replicates                                                                                                                                         |                                                                                                                                                                                  |
| 9    | Average groups                           | Calculate median of each group                                                                                                                                                                    | Calculate mean of each group                                                                                                                                                     |
| 10.1 | Combine expression columns               | Normalization of PP ratios on Prot ratios:<br>median PP ratios - median Prot ratios<br>→ <i>phospho regulation</i>                                                                                |                                                                                                                                                                                  |
| 10.2 |                                          | -                                                                                                                                                                                                 | Calculation of difference between normalized PP ratios of <i>asc1</i> <sup>T143A</sup> / <i>ASC1</i> and <i>ASC1</i> <sup>Aux</sup> / <i>ASC1</i><br>→ <i>phospho regulation</i> |
| 11   | Change column type                       | Change numerical column with <i>phospho regulation</i> (steps 10.1 and 10.2) to expression column                                                                                                 |                                                                                                                                                                                  |
| 12   | Categorical annotation rows              | Define column with <i>phospho regulation</i> as an own group for later filtering of values                                                                                                        |                                                                                                                                                                                  |
| 13   | Categorical annotation rows              | Group PP ratios for biological replicates for the next step                                                                                                                                       |                                                                                                                                                                                  |
| 14   | Filter rows based on valid values        | Filter for two valid PP ratios                                                                                                                                                                    | Filter for one valid PP ratio                                                                                                                                                    |
| 15.1 | Two samples tests                        | t-test, p value 0.01<br>PP ratios vs. Prot ratios                                                                                                                                                 | t-test, p value 0.05<br>PP ratios vs. Prot ratios for <i>asc1</i> <sup>T143A</sup> / <i>ASC1</i>                                                                                 |
| 15.2 |                                          | -                                                                                                                                                                                                 | t-test, p value 0.05<br>PP ratios <i>asc1</i> <sup>T143A</sup> / <i>ASC1</i> vs. PP ratios <i>ASC1</i> <sup>Aux</sup> / <i>ASC1</i>                                              |
| 16.1 | Filter rows                              | Keep rows with + (significant) from step 15.1                                                                                                                                                     |                                                                                                                                                                                  |

|                                                                                                                                                                         |                                          |                                                                                                                                                                                  |                                                                                                                  |
|-------------------------------------------------------------------------------------------------------------------------------------------------------------------------|------------------------------------------|----------------------------------------------------------------------------------------------------------------------------------------------------------------------------------|------------------------------------------------------------------------------------------------------------------|
| 16.2                                                                                                                                                                    | based on categorical columns             | -                                                                                                                                                                                | Keep rows with + (significant) from step 15.2                                                                    |
| 17                                                                                                                                                                      | Filter rows based on valid values        | Filter <i>phospho regulation</i> (steps 10-12) for values outside -0.26 to 0.26                                                                                                  |                                                                                                                  |
| Following steps only performed for <i>asc1</i> phospho-proteome analysis for phosphorylated peptides with zero to two corresponding prot ratios<br>Start from step 15.1 |                                          |                                                                                                                                                                                  |                                                                                                                  |
| 18                                                                                                                                                                      | One sample tests                         | t-test, p value 0.01<br>only phospho-peptide ratios                                                                                                                              |                                                                                                                  |
| 19                                                                                                                                                                      | Filter rows based on categorical columns | Discard rows with + (significant) from step 15.1 (these candidates showed regulation of PP ratios with respect to Prot values)                                                   |                                                                                                                  |
| 20                                                                                                                                                                      | Filter rows based on categorical columns | Keep rows with + (significant) from step 18                                                                                                                                      |                                                                                                                  |
| 21                                                                                                                                                                      | Categorical annotation rows              | Group Prot ratios<br>→ <i>proteome</i>                                                                                                                                           |                                                                                                                  |
| 22                                                                                                                                                                      | Filter rows based on valid values        | Filter rows on three valid values in the <i>proteome</i> group, add categorical column (assumption: less than three valid values might be not sufficient for two samples t-test) |                                                                                                                  |
| 23                                                                                                                                                                      | Filter rows based on categorical columns | Keep rows that were specified as <i>discarded</i> in the previous step (remaining candidates have less than three valid values in the <i>proteome</i> group)                     |                                                                                                                  |
| 24                                                                                                                                                                      | Filter rows based on valid values        | Filter rows on one valid values in <i>proteome</i> group, add categorical column                                                                                                 |                                                                                                                  |
|                                                                                                                                                                         |                                          | phosphorylated peptides with no corresponding Prot ratio                                                                                                                         | phosphorylated peptides with one or two corresponding Prot ratio(s)                                              |
| 25                                                                                                                                                                      | Filter rows based on categorical columns | Keep rows that were specified as <i>discarded</i> in the previous step, they have no <i>proteome</i> values                                                                      | Keep rows that were specified as <i>keep</i> in the previous step, they have one or two <i>proteome</i> value(s) |
| 26                                                                                                                                                                      | Change column type                       | Change numerical column with PP median ratio (step 9.1) to expression column                                                                                                     | -                                                                                                                |
| 27                                                                                                                                                                      | Categorical annotation rows              | Define column with PP median ratio from the previous step as an own group for filtering of values in the next step<br>→ <i>phospho regulation with no Prot value</i>             | -                                                                                                                |
| 28                                                                                                                                                                      | Filter rows based on valid values        | Filter <i>phospho regulation with no Prot value</i> (step 27) for values outside -0.26 to 0.26                                                                                   | Filter <i>phospho regulation</i> (step 10.1) for values outside -0.26 to 0.26                                    |

- = fragment b-ions \* = neutral loss of ammonia (-17 Da) [+1], [+2], [+3] = charge states
- = fragment y-ions ° = neutral loss of water (-18 Da) lower case t = phosphorylated residue

KS121\_MSA\_4.raw #7491 RT: 83.19  
 ITMS, CID, z=+3, Mono m/z=973.13885 Da, MH+=2917.40201 Da, Match Tol.=0.6 Da

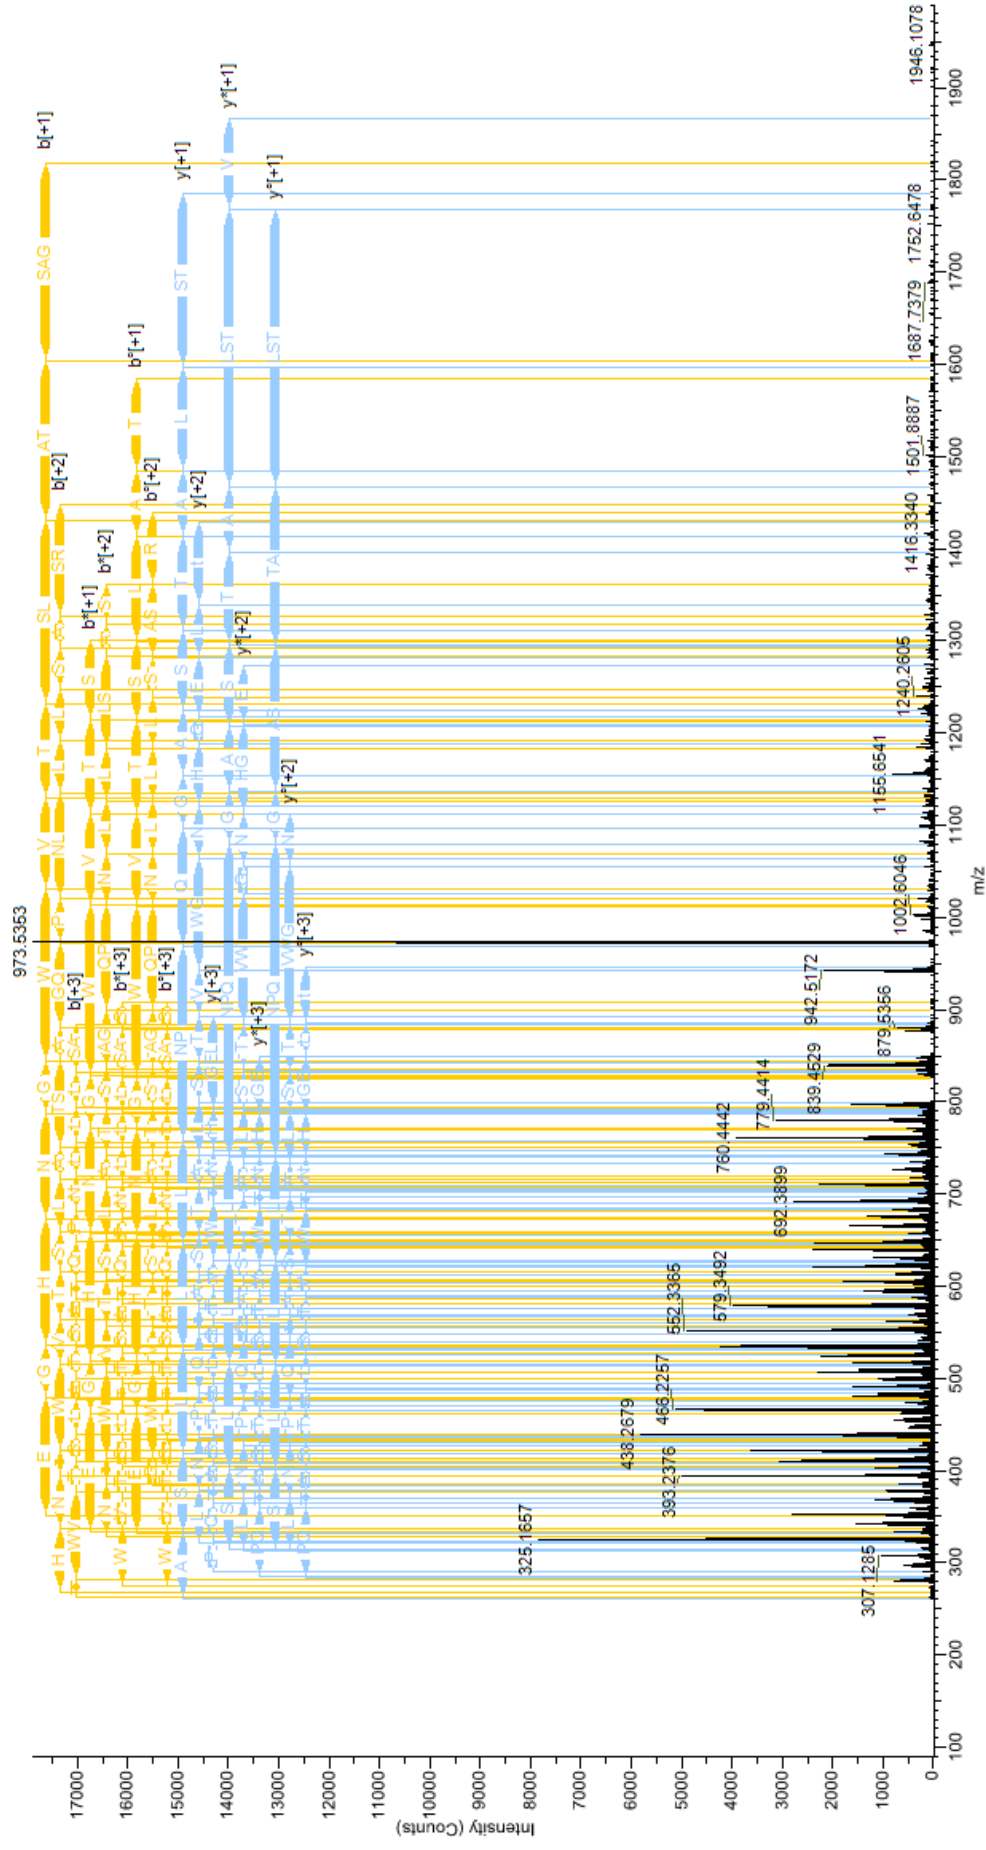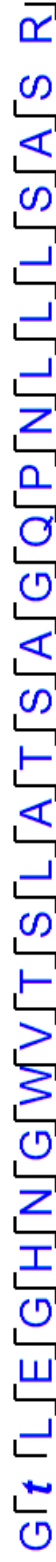

FIG. S1. Annotated fragmentation spectra of Asc I p phospho-peptides.

(A) Annotated fragmentation spectrum of the peptide GTLEHGHWVTSLSLAWVTSAGQPNLLSASR phosphorylated at T12

- = fragment b-ions \* = neutral loss of ammonia (-17 Da) [+1], [+2], [+3] = charge states
- = fragment y-ions ° = neutral loss of water (-18 Da) lower case s = phosphorylated residue

KS121\_HCD\_S120.raw #906 RT: 34.80  
 FTMS, HCD, z=+2, Mono m/z=565.27484 Da, MH+=1129.54241 Da, Match Tol.=0.6 Da

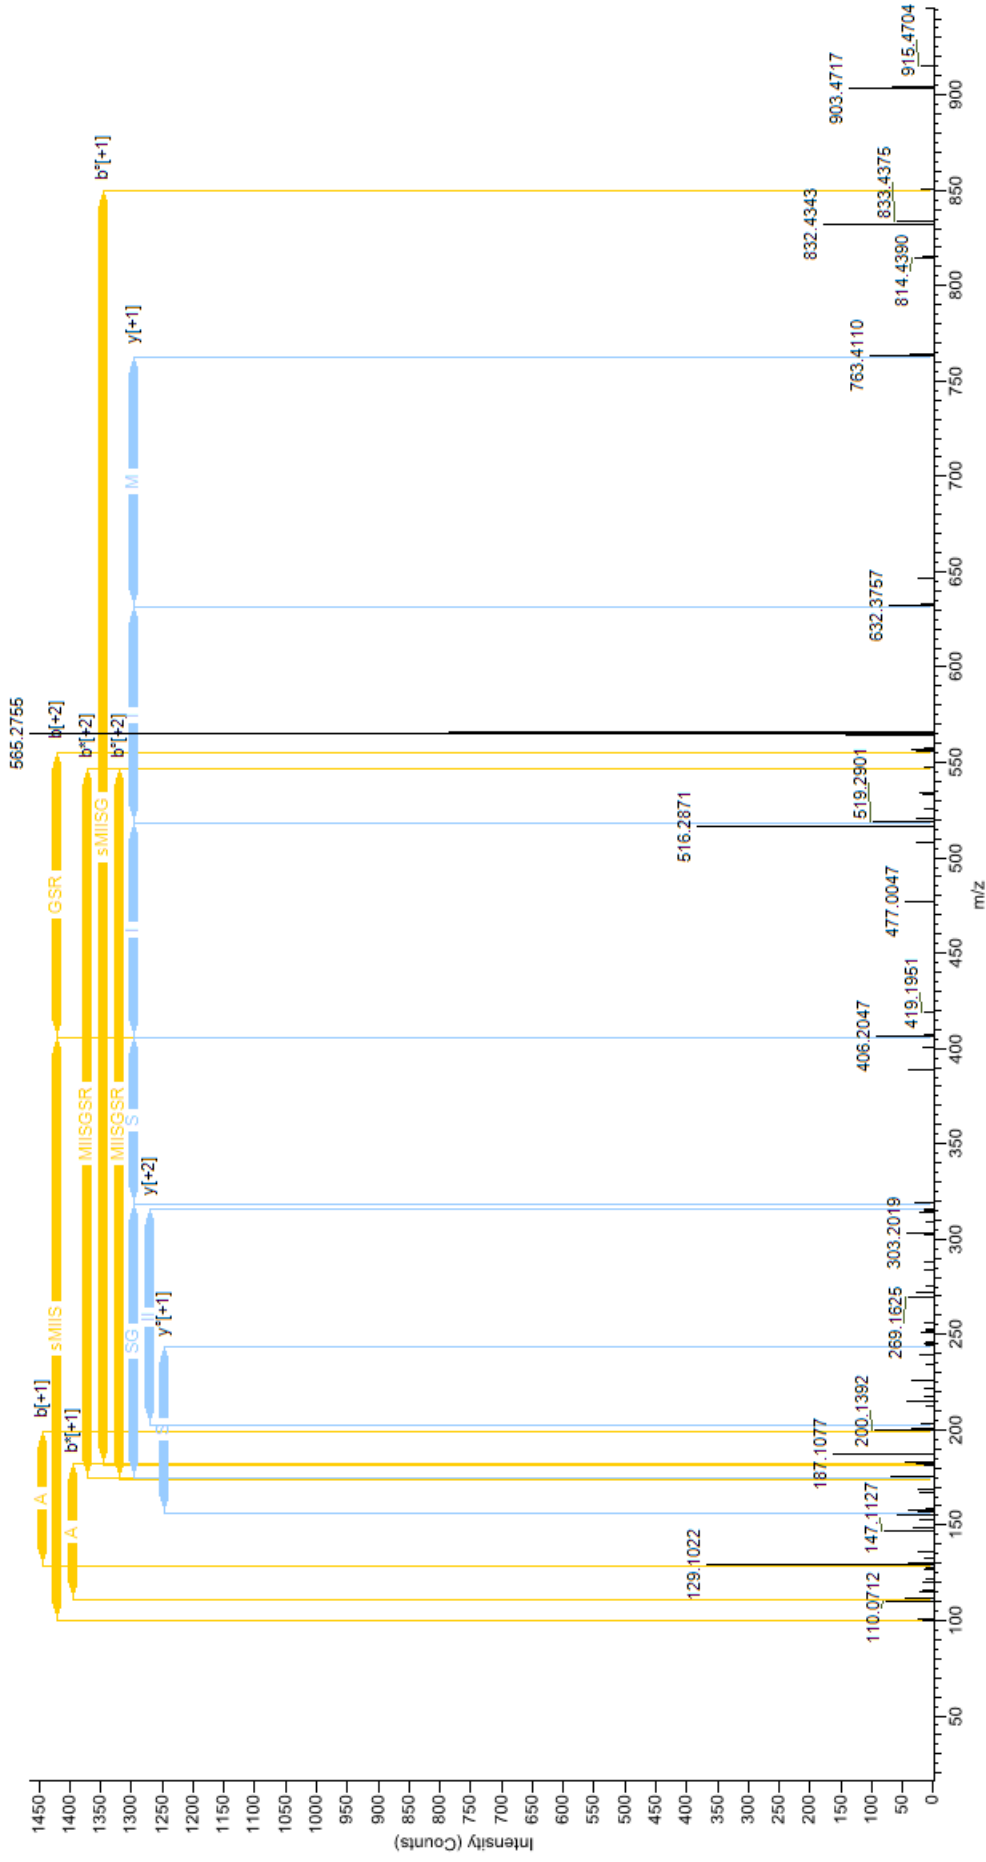

**K]A]s[M]I[S]G S[R]**

(B) Phosphorylated fragmentation spectrum of the peptide KASMIISGSR phosphorylated at S120

- = fragment b-ions \* = neutral loss of ammonia (-17 Da) [+1], [+2], [+3] = charge states
- = fragment y-ions ° = neutral loss of water (-18 Da) lower case t/c = phosphorylated residue/carbamidomethylated cysteine

KS121\_MSA\_3.raw #7945 RT: 85.24  
 ITMS, CID, z=+3, Mono m/z=712.00018 Da, MH+=2133.98600 Da, Match Tol.=0.6 Da

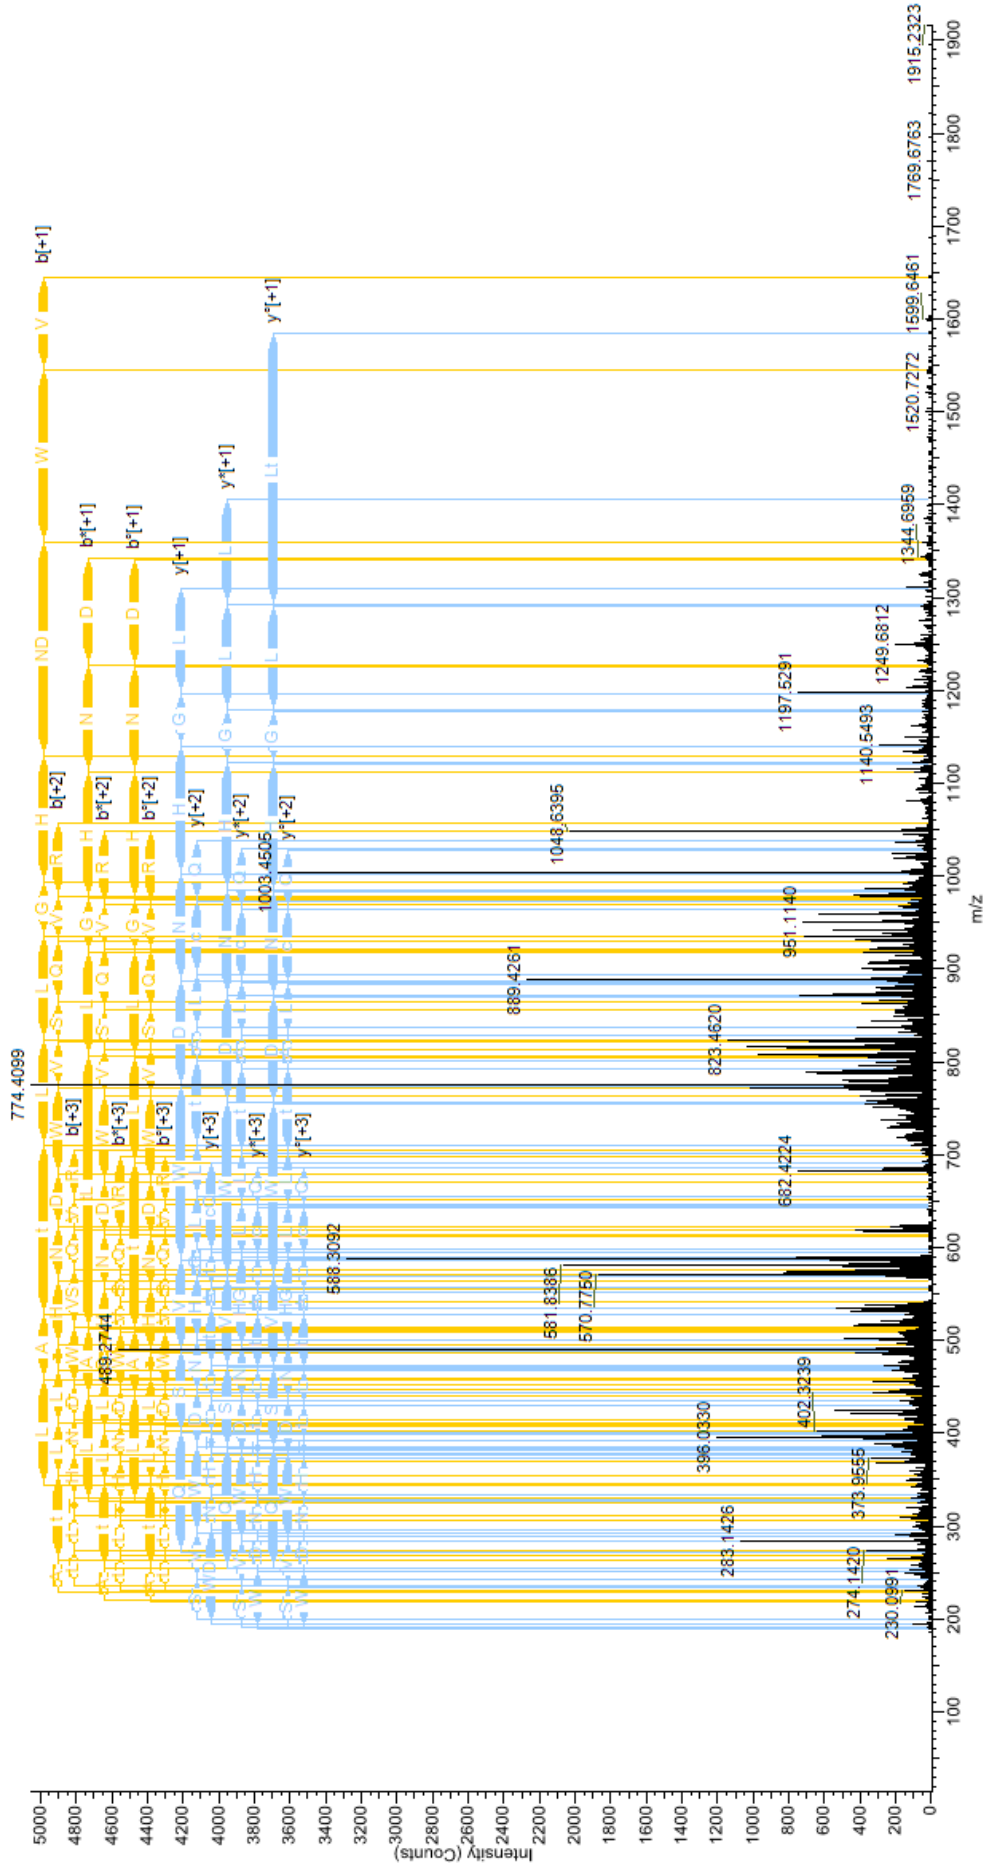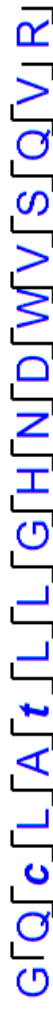

(C) Annotated fragmentation spectrum of the peptide GQCLATLLGHNDWV[S]Q[V]R phosphorylated at T143

- = fragment b-ions \* = neutral loss of ammonia (-17 Da) [+1], [+2], [+3] = charge states
- = fragment y-ions ° = neutral loss of water (-18 Da) lower case s = phosphorylated residue

KS121\_MSA\_3.raw #4431 RT: 55.06  
 ITMS, CID, z=+2, Mono m/z=800.84229 Da, MH+=1600.67729 Da, Match Tol.=0.6 Da

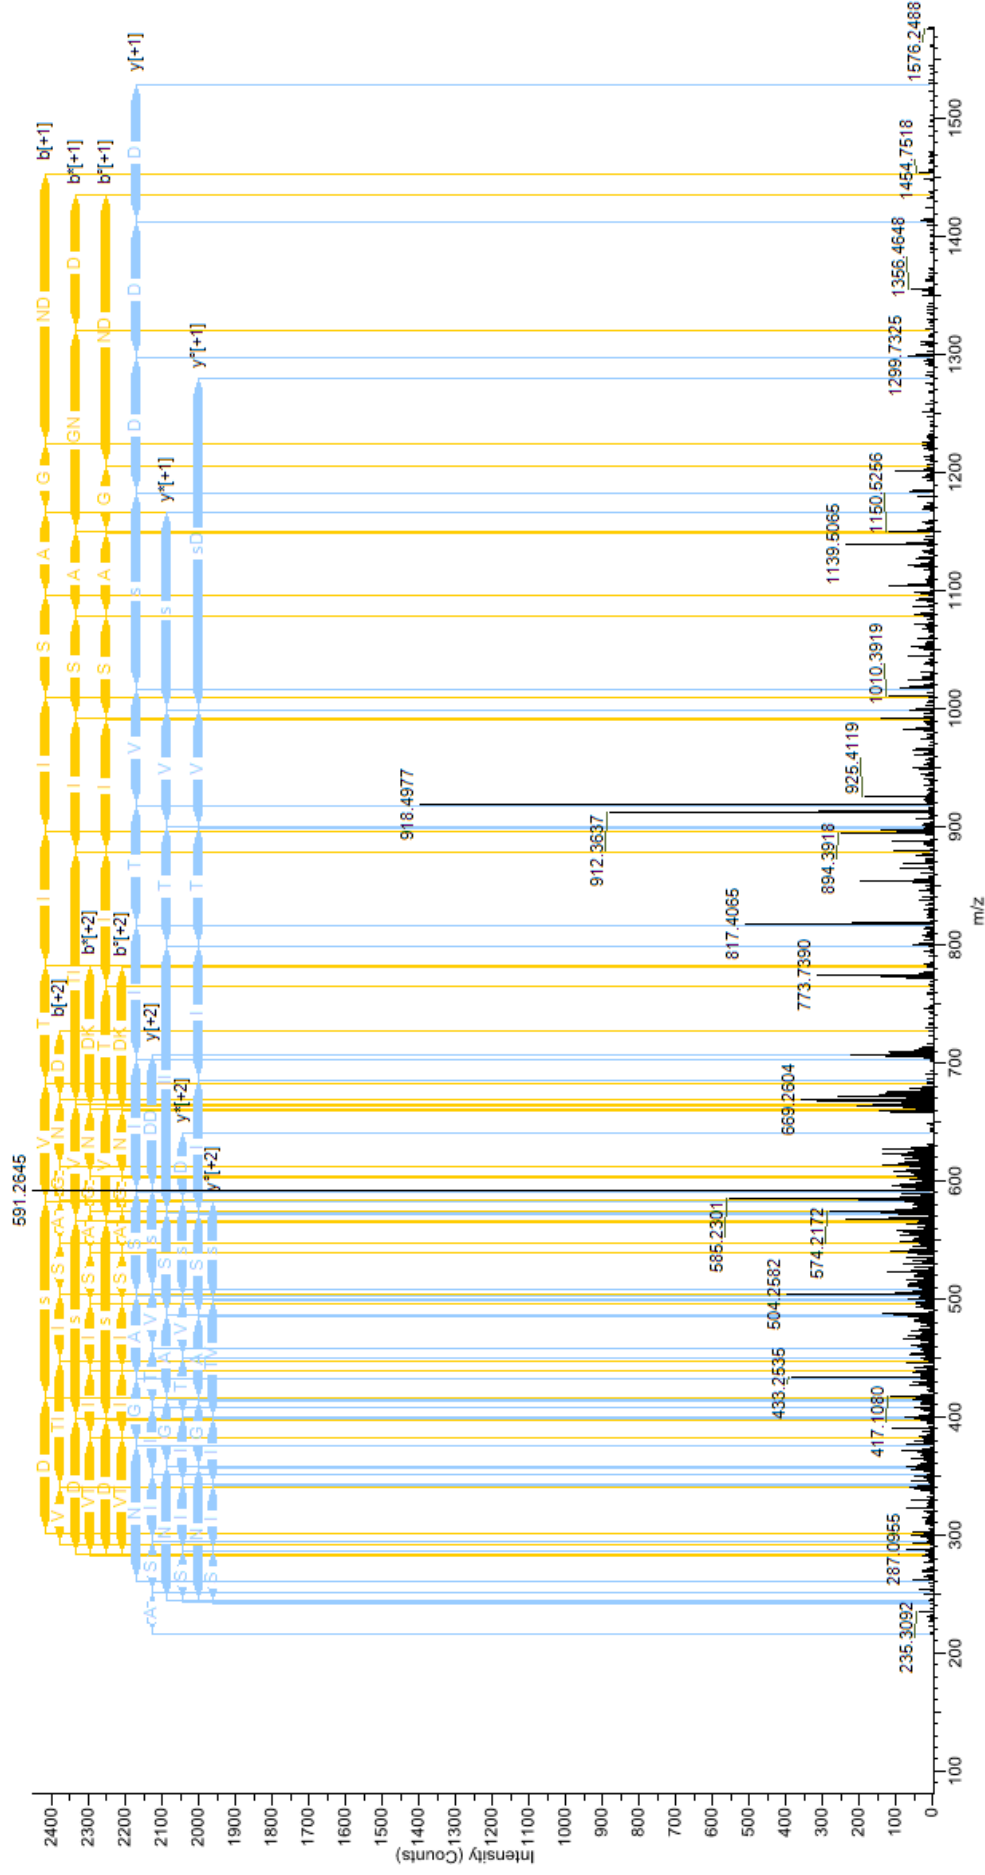

A[D][D][D][s][V][T][I][I][S][A][G][N][D][J][K]

(D) Annotated fragmentation spectrum of the peptide ADDDSVTIISAGNDK phosphorylated at S166

- = fragment b-ions \* = neutral loss of ammonia (-17 Da) [+1], [+2], [+3] = charge states
- = fragment y-ions ° = neutral loss of water (-18 Da) lower case s = phosphorylated residue

KS121\_MSA\_3.raw #3947 RT: 50.92  
 ITMS, CID, z=+3, Mono m/z=756.35211 Da, MH+=2267.04178 Da, Match Tol.=0.6 Da

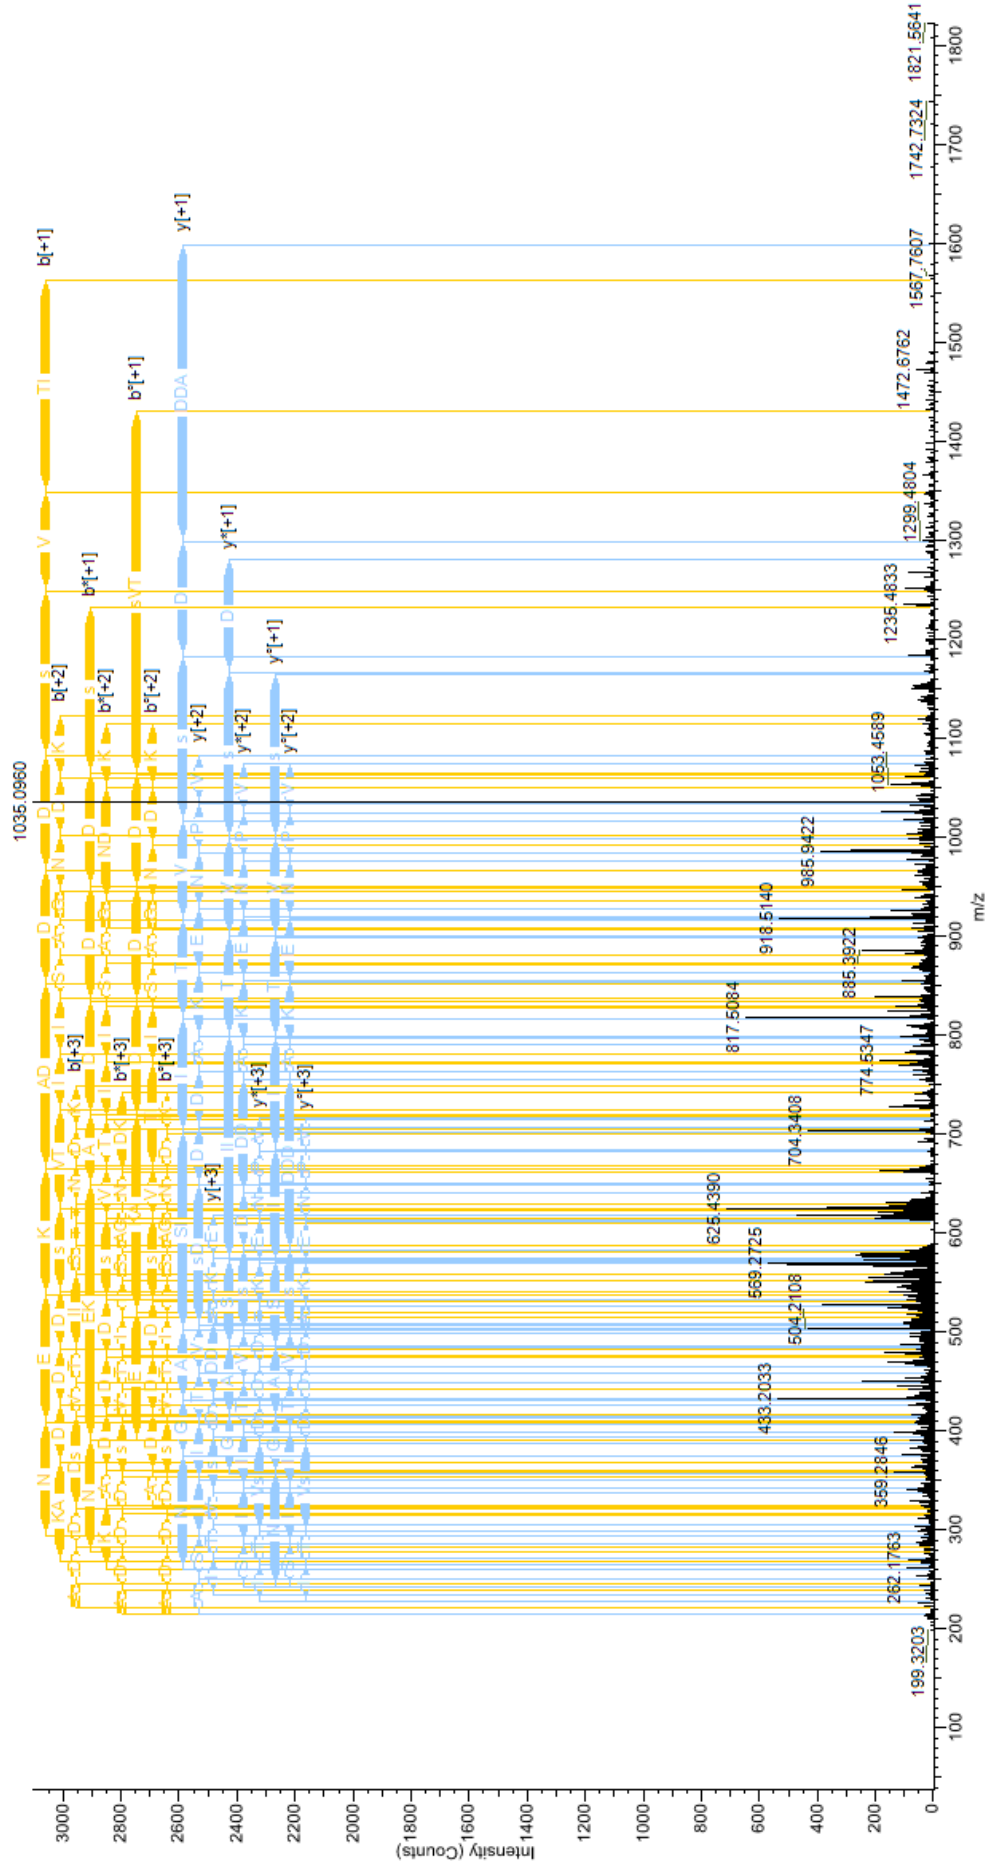

V[V]P[N][E][K][A][D][D][S][V][T][I][I][S][A][G][N][D][K]

(E) Annotated fragmentation spectrum of the peptide VVPNEKADDSVTIISAGNDK phosphorylated at S166



- = fragment b-ions \* = neutral loss of ammonia (-17 Da) [+1], [+2], [+3] = charge states
- = fragment y-ions ° = neutral loss of water (-18 Da) lower case t = phosphorylated residue

KS121\_MSA\_3.raw #4473 RT: 55.35  
 ITMS, CID, z=+2, Mono m/z=800.84204 Da, MH+=1600.67681 Da, Match Tol.=0.6 Da

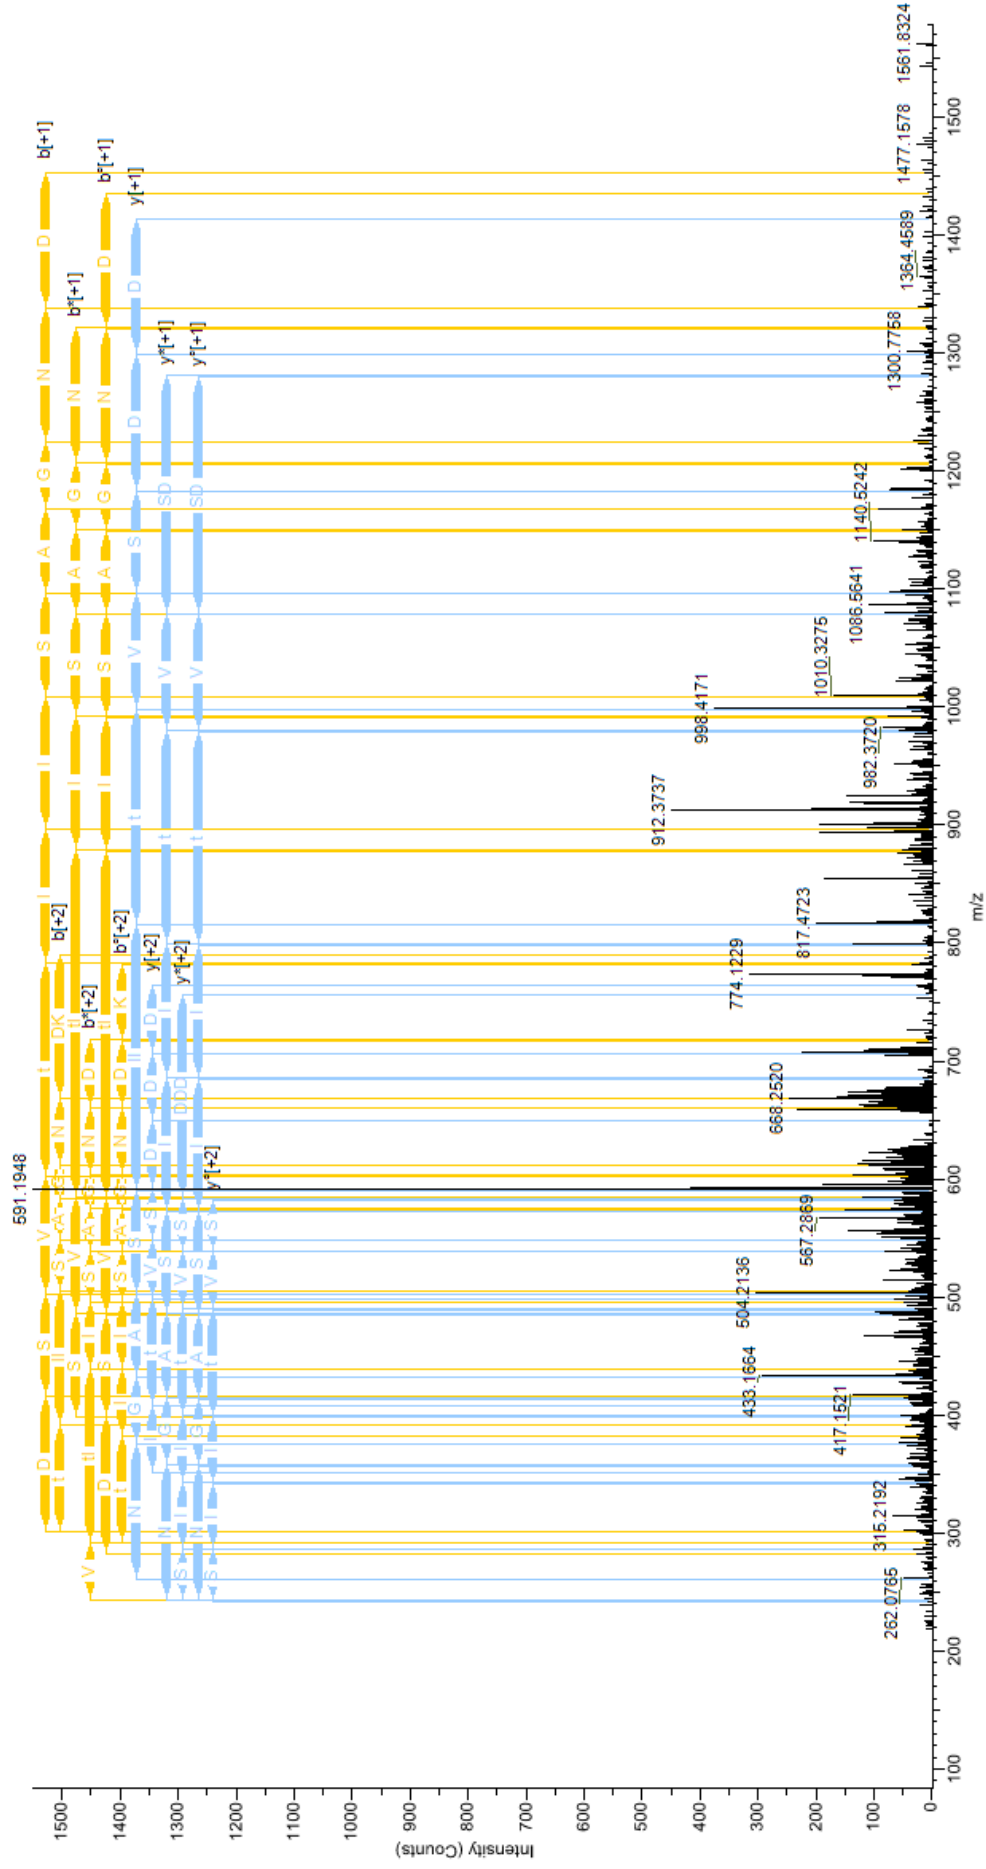

A[D][D][S][V][t][I][I][S][A][G][N][D][K]

(F) Annotated fragmentation spectrum of the peptide ADDDSVTTIISAGNDK phosphorylated at T168

- = fragment b-ions \* = neutral loss of ammonia (-17 Da) [+1], [+2], [+3] = charge states lower case t = phosphorylated residue
- = fragment y-ions ° = neutral loss of water (-18 Da)

KS121\_MSA.raw #3840 RT: 50.79  
 ITMS, CID, z=+3, Mono m/z=756.35431 Da, MH+=2267.04837 Da, Match Tol.=0.6 Da

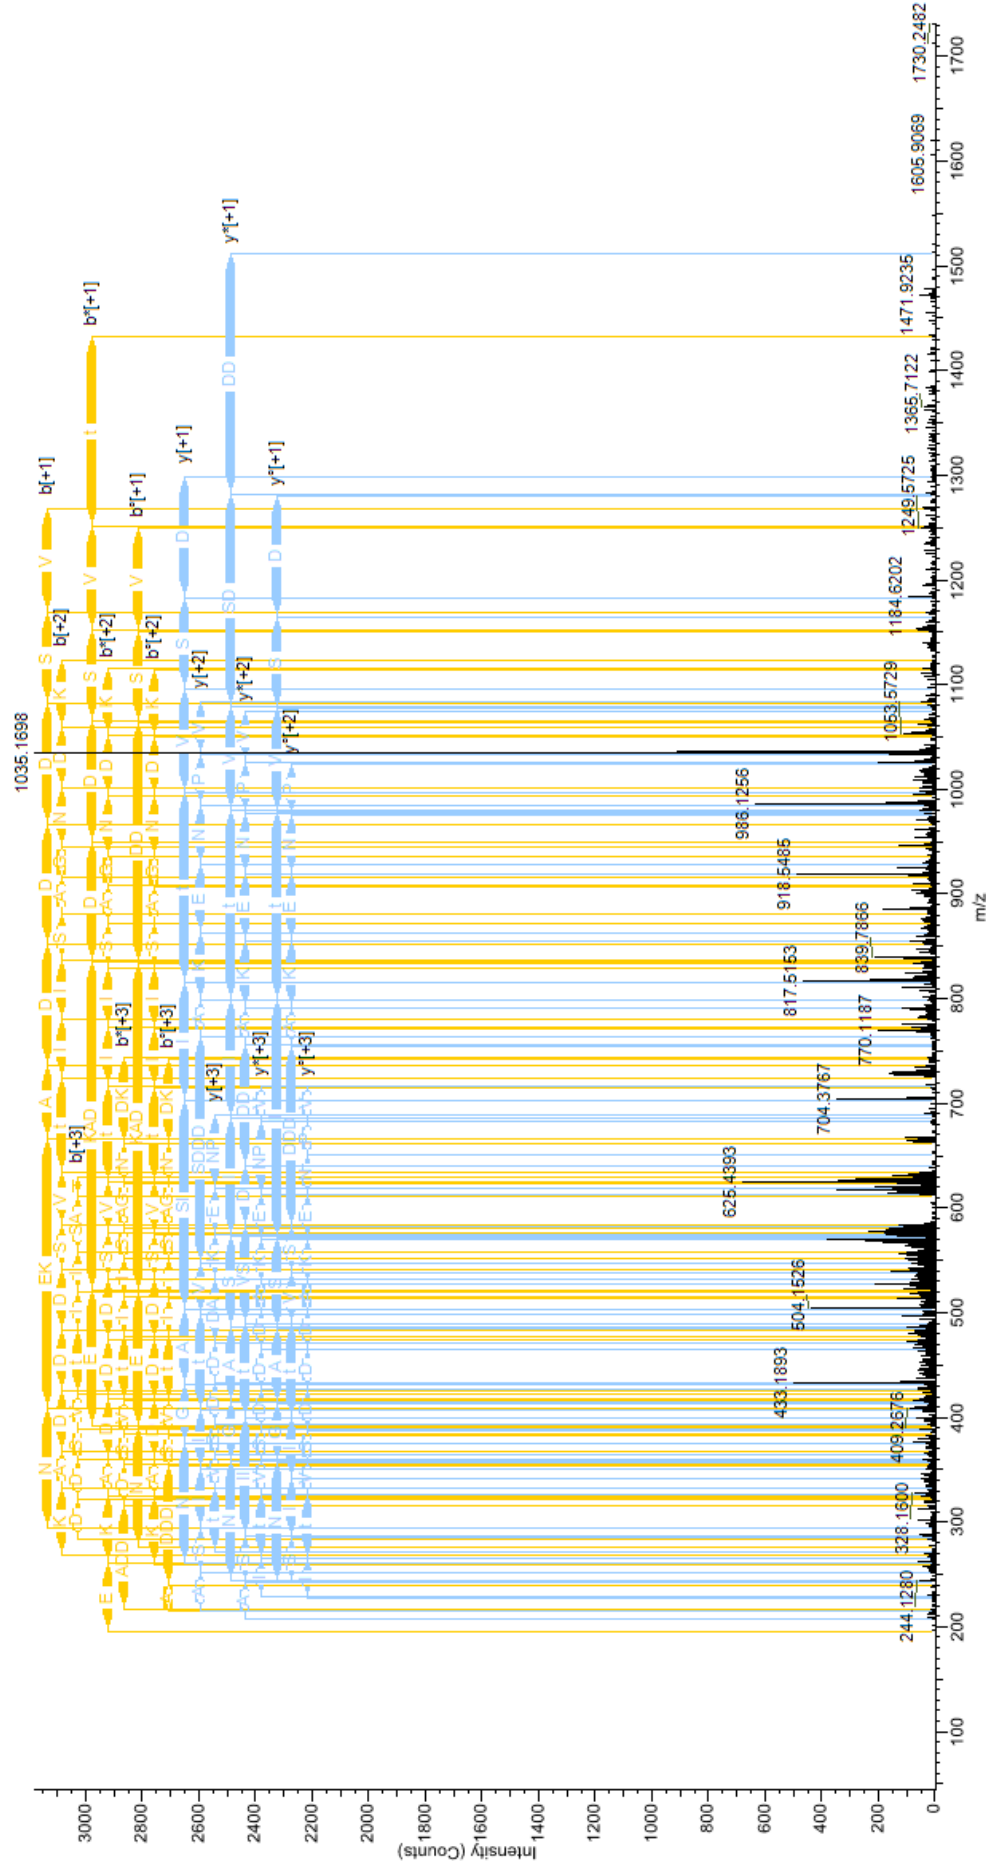

V[V][P][N][E][K][A][D][D][S][V][t][I][I][S][A][G][N][D][K]KJ

(G) Annotated fragmentation spectrum of the peptide VVPNEKADDDSVTIISAGNDK phosphorylated at T168

- = fragment b-ions \* = neutral loss of ammonia (-17 Da) [+1], [+2], [+3] = charge states
- = fragment y-ions ° = neutral loss of water (-18 Da) lower case y = phosphorylated residue

KS110\_MSA.raw #5418 RT: 51.36  
 ITMS, CID, z=+2, Mono m/z=673.33575 Da, MH+=1345.66423 Da, Match Tol.=0.6 Da

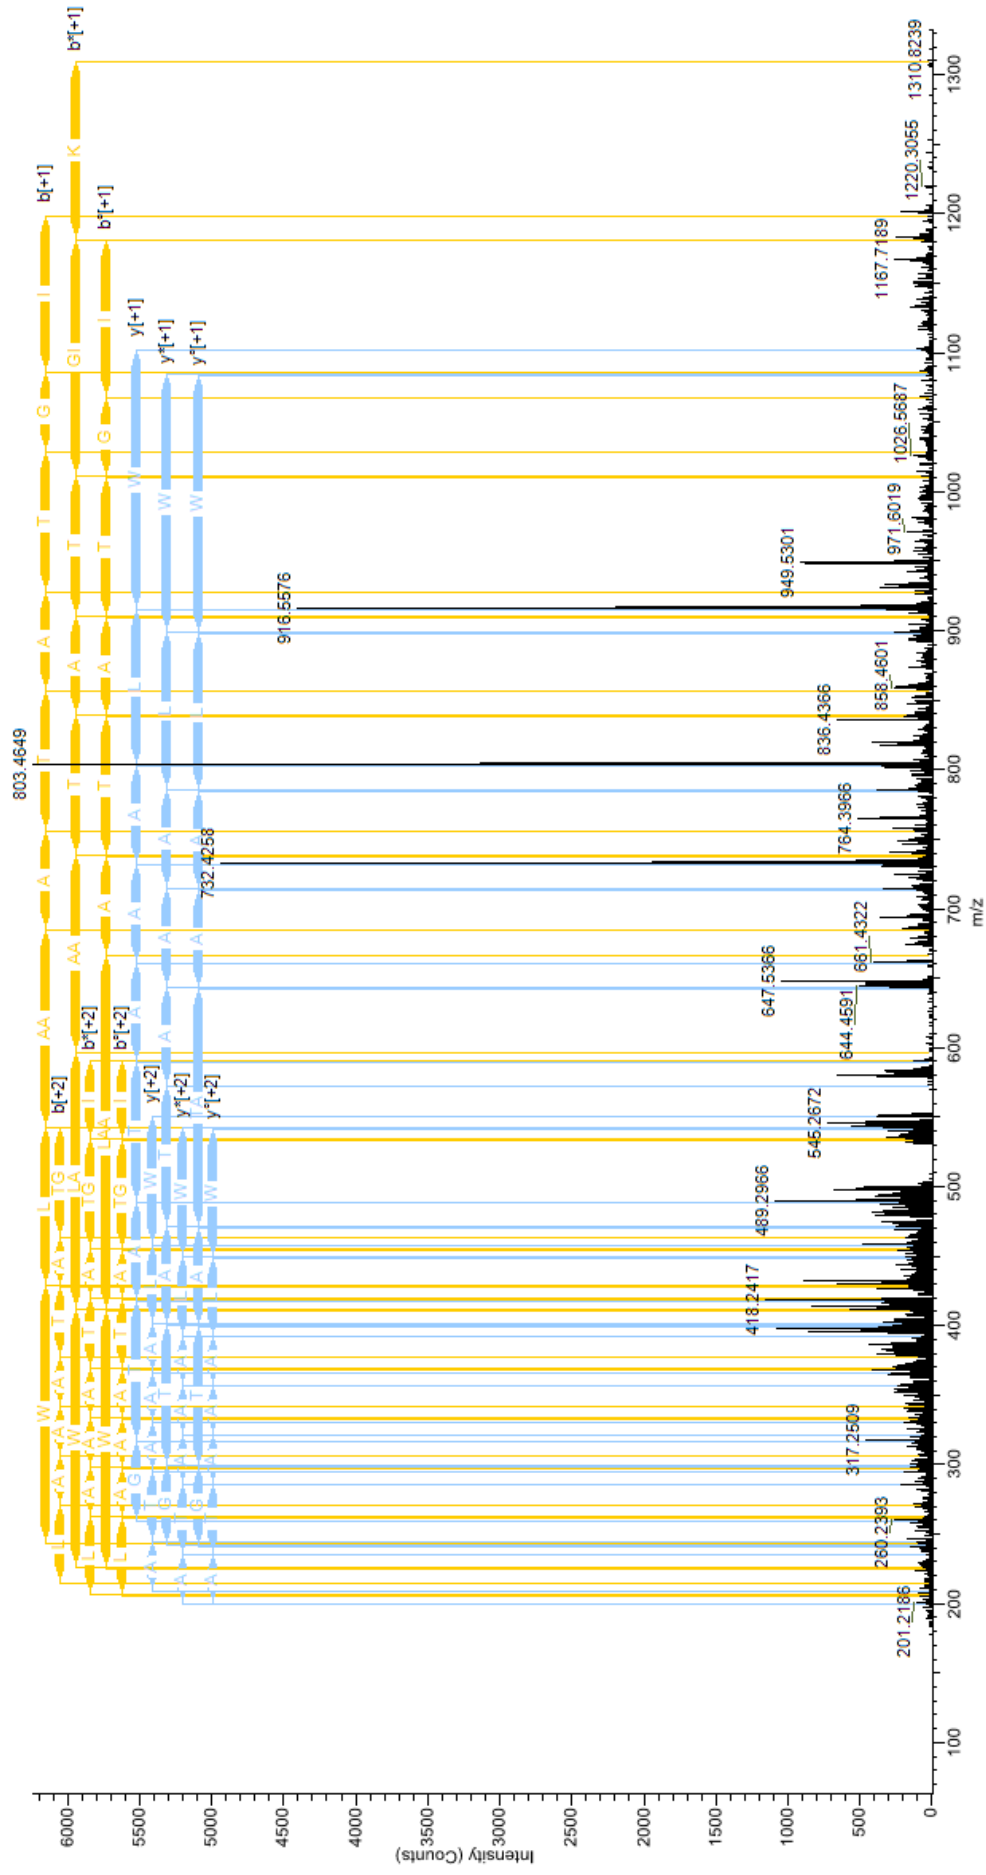

**Y**W**L**A**A**A**T**A**T****G****I****I****K**

(H) Annotated fragmentation spectrum of the peptide YWLAATAATGIIK phosphorylated at Y250

- = fragment b-ions \* = neutral loss of ammonia (-17 Da) [+1], [+2], [+3] = charge states
- = fragment y-ions ° = neutral loss of water (-18 Da) lower case t = phosphorylated residue

KS121\_HCD\_4.raw #5265 RT: 86.24  
 FTMS, HCD, z=+3, Mono m/z=1014.14655 Da, MH+=3040.42508 Da, Match Tol.=0.6 Da

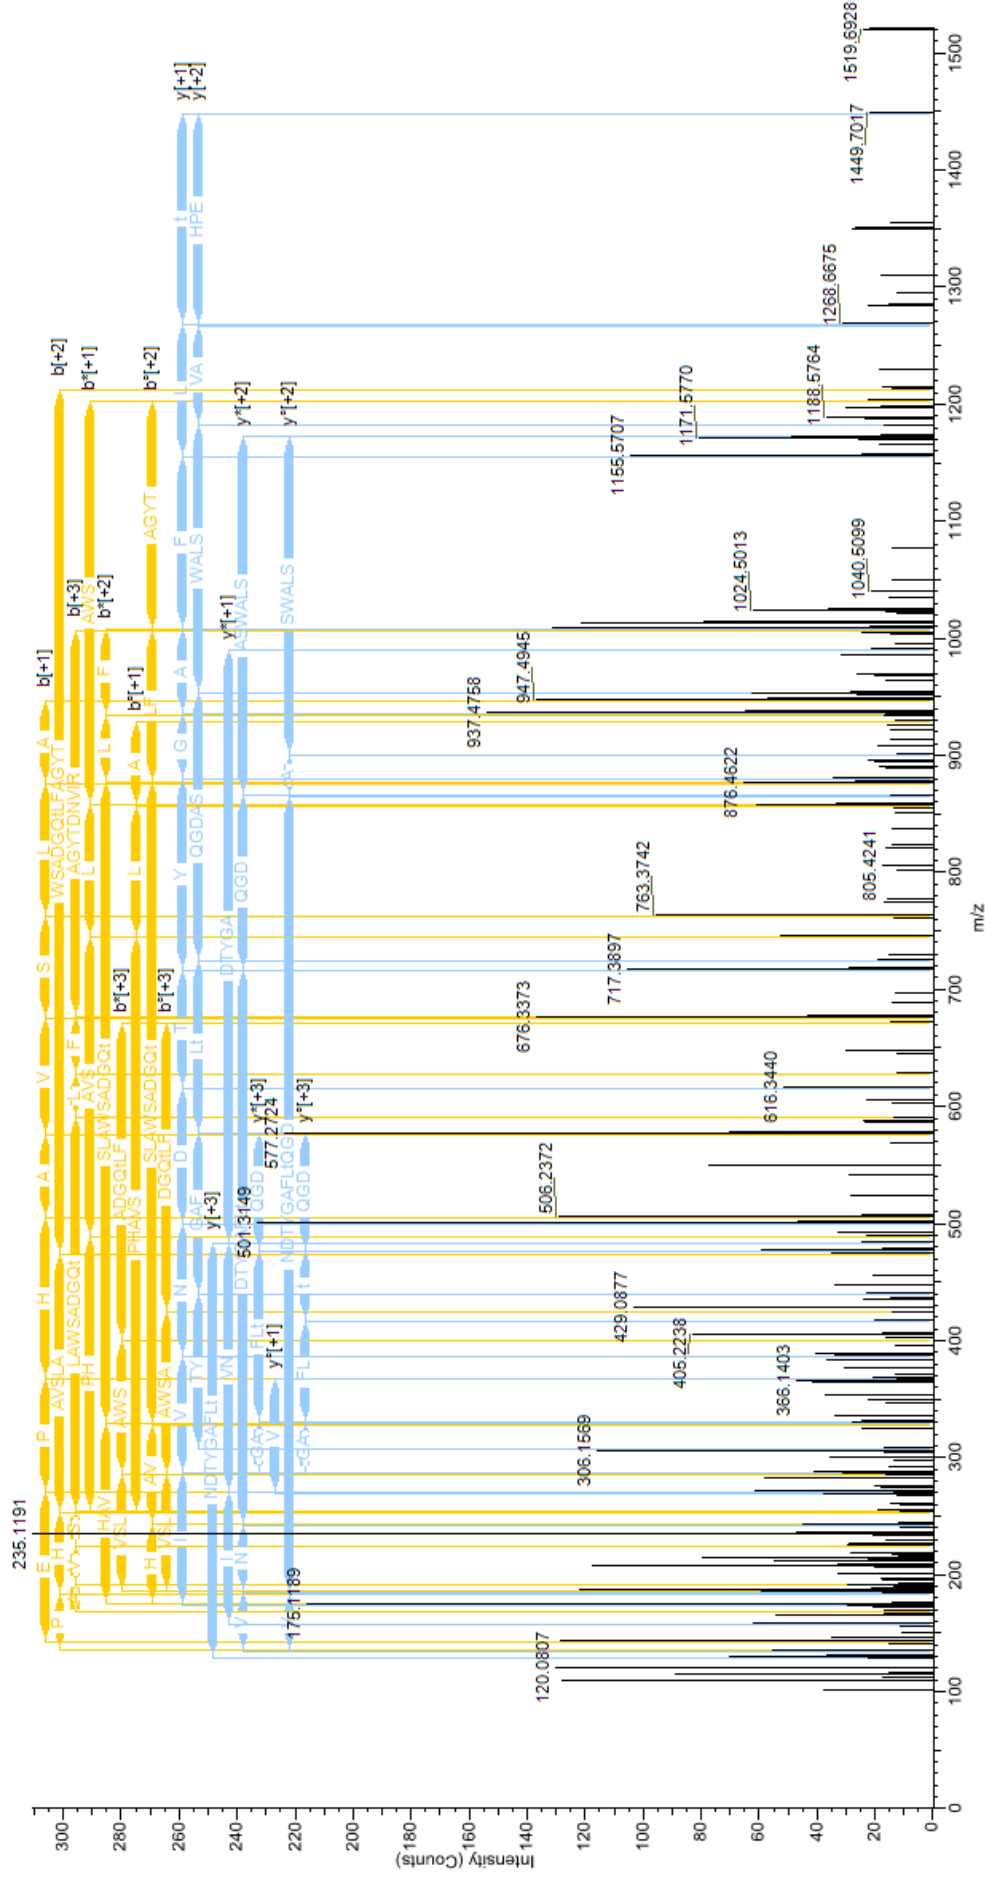

A A[E]P[H]A[V]S[L]A[WS]A D G Q[t]L[F]A[G]Y[T]D[N]V[I]R

(D) Annotated fragmentation spectrum of the peptide AAEPH[V]S[L]A[WS]ADGQTLFAGYTDNVIR phosphorylated at T300

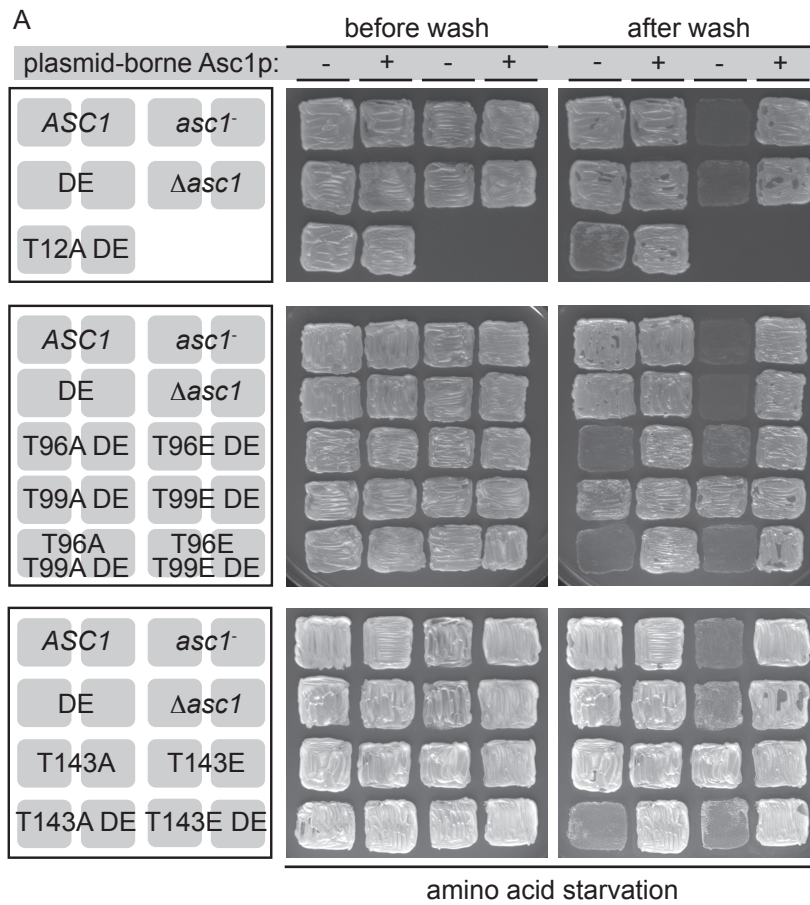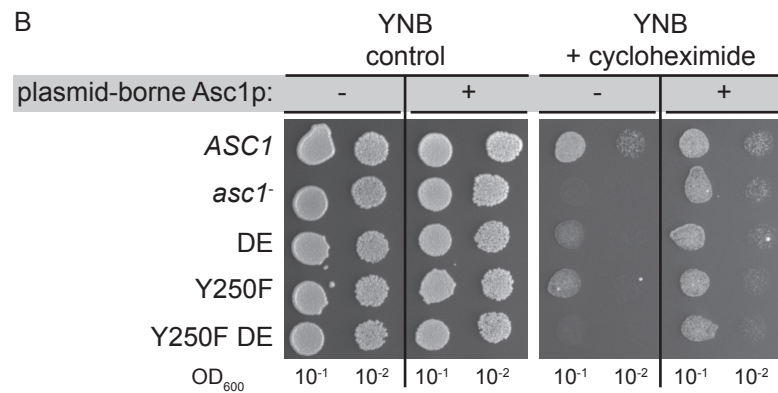

Figure S2

1 **FIG. S2. Complementation of *ASC1* phospho-site mutant phenotypes by expression of**  
2 **plasmid-borne wild-type *ASC1***

3 Phospho-site mutants were transformed with a high-copy number plasmid carrying the wild-type  
4 *ASC1* gene under the control of the *MET25*-promoter (*ASC1*, pME2624) or with the empty vector  
5 (EV, pME2787) as control. The *ASC1* wild-type, *ascI*<sup>-</sup>,  $\Delta$ *ascI* and *ascI*DE strains were  
6 transformed with the same plasmids as further controls.

7 (A) Haploid adhesive growth at amino acid starvation caused by 10 mM 3-amino-1,2,4-triazole  
8 (3-AT). Plasmid-transformed phospho-site mutants *ascI*<sup>T12A</sup>DE, *ascI*<sup>T96A</sup>DE, *ascI*<sup>T96E</sup>DE,  
9 *ascI*<sup>T99A</sup>DE, *ascI*<sup>T96A T99A</sup>DE, *ascI*<sup>T96E T99E</sup>DE, *ascI*<sup>T143A</sup>DE, and *ascI*<sup>T143E</sup>DE and control strains  
10 were patched on the 3-AT containing YNB plates and subjected to wash tests after 3 d of growth.  
11 The *ascI*<sup>T99E</sup>DE, *ascI*<sup>T143A</sup>, and *ascI*<sup>T143E</sup> strains, that are not impaired in adhesive growth, served  
12 as additional controls. Plates are shown before and after the washing step.

13 (B) Drop dilution assay to evaluate cycloheximide sensitivity. Cell suspensions of plasmid-  
14 transformed phospho-site mutant strains *ascI*<sup>Y250F</sup> and *ascI*<sup>Y250F</sup>DE and control strains were  
15 applied onto YNB plates containing 0.15  $\mu$ g/ml.

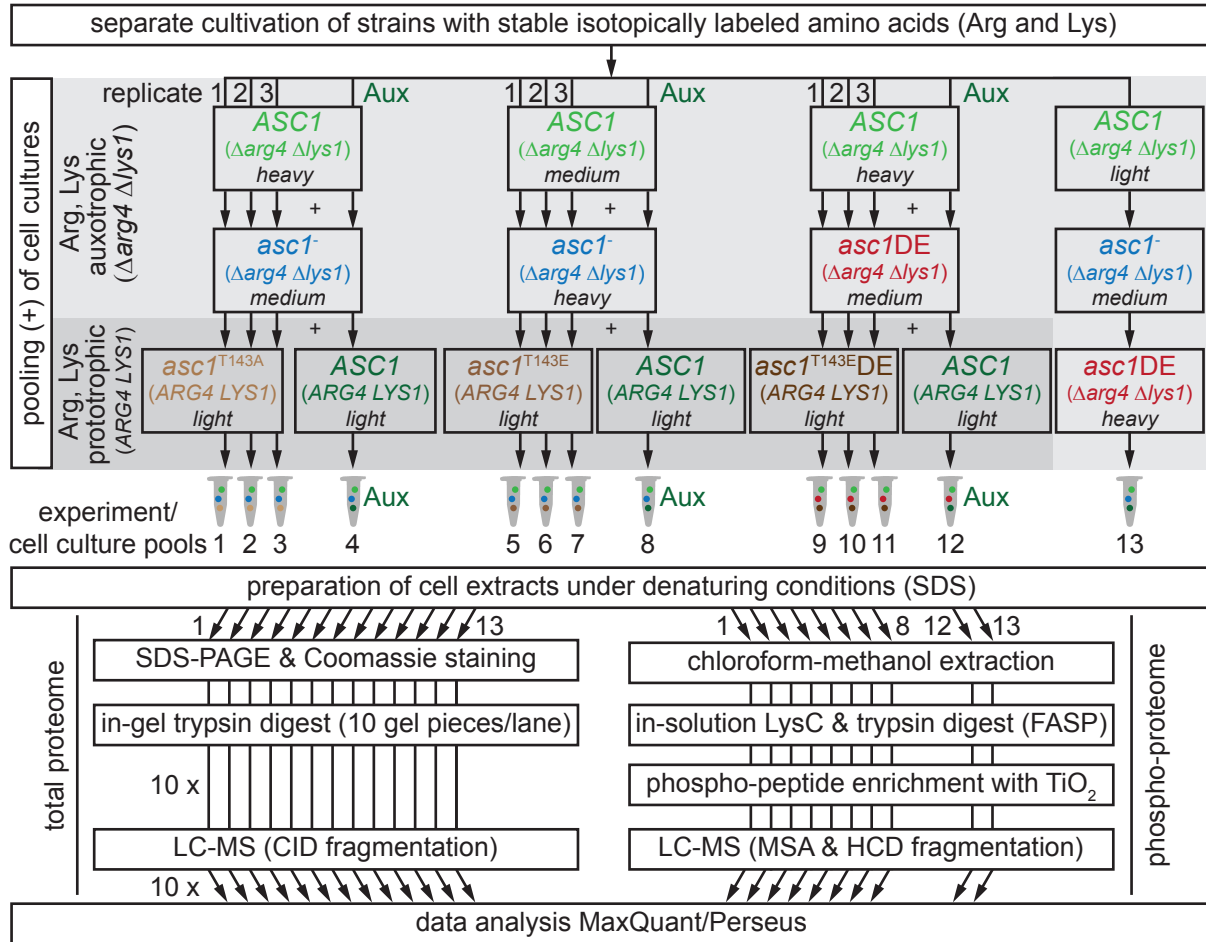

Figure S3

1 **FIG. S3. Analysis of the Asc1p-dependent phospho-proteome**  
2 Peptide sample preparation for SILAC and LC-MS based Asc1p-dependent phospho-proteome  
3 and proteome analyses. *S. cerevisiae* strains were cultivated in the presence of *light*, *medium* or  
4 *heavy* labeled arginine and lysine. Arrows indicate which strains were pooled and indicate the  
5 number of replicates. Strains with the phospho-site T143 mutated were arginine and lysine  
6 prototroph and therefore cultivated in the presence of the naturally occurring light amino acids  
7 ( $\text{Arg}^0$ ,  $\text{Lys}^0$ ). To distinguish between changes caused by the Asc1p mutations or differences in  
8 arginine and lysine metabolism (prototroph *ARG4 LYS1* strains versus auxotroph  $\Delta\text{arg4 } \Delta\text{lys1}$   
9 strains), an *auxotrophy-control* *ASCI*<sup>Aux</sup> (Aux) was included in the experiments that is an *ASCI*  
10 wild-type strain prototrophic for arginine and lysine (*ARG4 LYS1*). In total, 13 independent cell  
11 pools were obtained and subjected to the subsequent preparation of cell extracts. The protein  
12 extracts were split in two and processed separately for the proteome and phospho-proteome  
13 analyses as described in detail in the *Materials and Methods* section. For the phospho-proteome  
14 analysis only protein extracts of experiments 1-8 and 12-13 were further processed. The  
15 encompassing set of data of the experiments and details about data analysis are compiled in the  
16 Excel workbook Table S6 and Tables S4 and S5.
